# Supplementary material
Source: MDPI journal article supplement (https://www.mdpi.com/2306-5338/10/12/231)
Supplement: s1 [file s1]

### Supplementary Material:

Table S1. The weight assigned to different parameters.

| Parameters                     | Range               | Weight | Parameters                | Range                         | Weight |
|--------------------------------|---------------------|--------|---------------------------|-------------------------------|--------|
| Depth to<br>water Table<br>(m) | 0 – 2               | 10     | Topography                | 0 – 5                         | 10     |
|                                | 2 – 5               | 8      |                           | 5 – 10                        | 8      |
|                                | 5 – 10              | 6      |                           | 10 – 20                       | 6      |
|                                | 10 – 20             | 4      |                           | 20 – 30                       | 4      |
|                                | 20 – 40             | 2      |                           | 30 – 40                       | 2      |
|                                | > 40                | 1      |                           | 40 – 50                       | 1      |
| Net<br>Recharge(mm)            | 0 – 100             | 1      | Impact of<br>Vadose Zone  | >50                           | 1      |
|                                | 100 – 200           | 1      |                           | Aravalli<br>Supergroup        | 5      |
|                                | 200 – 300           | 1      |                           | Bhilwara<br>Supergroup        | 6      |
|                                | 300 – 400           | 2      |                           | Delhi Supergroup              | 7      |
|                                | 400 – 500           | 3      |                           | Extrusive/Intrusive<br>group  | 6      |
|                                | 500 - 600           | 4      |                           | Marwar<br>Supergroup          | 5      |
| Aquifer Media                  | 600 - 700           | 5      | Hydraulic<br>Conductivity | Quaternary<br>Sediments       | 9      |
|                                | 700-800             | 7      |                           | Tertiary                      | 4      |
|                                | 800-900             | 8      |                           | Vindhyan<br>Supergroup        | 8      |
|                                | 900-1000            | 9      |                           | Waterbody                     | 10     |
|                                | >1000               | 10     |                           | 0.002 - 0.2                   | 1      |
|                                | Basalt              | 2      |                           | 0.2 - 0.5                     | 2      |
|                                | BGC                 | 2      |                           | 0.5 - 2                       | 2      |
|                                | Bilara<br>Limestone | 4      |                           | 1 – 5                         | 3      |
|                                | Gneiss              | 2      | LULC                      | Agriculture Land              | 8      |
|                                | Granite             | 2      |                           | Built-up                      | 10     |
|                                | Hills               | 3      |                           | Wastelands                    | 6      |
|                                | Limestone           | 4      |                           | Grassland and<br>grazing land | 7      |
|                                | Older<br>Alluvium   | 6      |                           | Forest                        | 6      |

|            |                       |    |                    |              |   |
|------------|-----------------------|----|--------------------|--------------|---|
|            | Phyllite              | 7  |                    | Water bodies | 1 |
|            | Quartzite             | 3  | Temperature<br>Map | < 30         | 2 |
|            | Reserve<br>Forest     | 8  |                    | 30 - 34      | 3 |
|            | Rhyolite              | 6  |                    | 34 - 36      | 4 |
|            | Sandstone             | 7  |                    | >36          | 5 |
|            | Tertiary<br>Sandstone | 7  |                    |              |   |
|            | Schist                | 4  |                    |              |   |
|            | Shale                 | 10 |                    |              |   |
|            | Ultra-Basic           | 4  |                    |              |   |
|            | Younger<br>Alluvium   | 7  |                    |              |   |
| Soil media | Sandy Clay            | 2  |                    |              |   |
|            | Clayey Soil           | 2  |                    |              |   |
|            | Clayey<br>Skeletal    | 2  |                    |              |   |
|            | Coarse<br>Loamy       | 6  |                    |              |   |
|            | Fine Sandy            | 4  |                    |              |   |
|            | Fine Loamy            | 6  |                    |              |   |
|            | Fine Silty            | 6  |                    |              |   |
|            | Loamy Soil            | 6  |                    |              |   |
|            | Loamy<br>Skeletal     | 6  |                    |              |   |
|            | Sandy<br>Skeletal     | 8  |                    |              |   |

---
